# Supplementary material for: Efficacy and Safety of Oral Janus Kinase 1 Inhibitor Abrocitinib for Patients With Atopic Dermatitis: A Phase 2 Randomized Clinical Trial
Source: PubMed Central journal article supplement — JAMA Dermatol. 2019 Oct 2;155(12):1371–9. doi: 10.1001/jamadermatol.2019.2855 (PMC6777226; doi:10.1001/jamadermatol.2019.2855), 2019-10-02
Supplement: jamadermatol-155-1371-s001.pdf [file jamadermatol-155-1371-s001.pdf]

## Supplementary Online Content

Gooderham MJ, Forman SB, Bissonnette R, et al. Efficacy and safety of oral Janus kinase 1 inhibitor abrocitinib for patients with atopic dermatitis: a phase 2 randomized clinical trial. Published online October 2, 2019. *JAMA Dermatol*. doi:10.1001/jamadermatol.2019.2855

**eFigure 1.** Average Daily Inhibiting Concentration for Specified Percentage Effect With Key Cytokines in Atopic Dermatitis

**eFigure 2.** Study Design

**eFigure 3.** Proportion of Patients Achieving Investigator's Global Assessment Clear or Almost Clear With  $\geq 2$ -Grade Improvement from Baseline at Week 12 (Emax Fitted Curve With Standard Error)

**eFigure 4.** Proportion of Patients With Baseline Pruritus NRS Score of  $\geq 4$  Achieving  $\geq 4$ -Point Improvement From Baseline Over the First 2 Weeks

**eFigure 5.** Photographic Evidence

**eFigure 6.** Mean Absolute Value Versus Time for Platelets

**eAppendix.** Inclusion and Exclusion Criteria

**eTable 1.** Investigators

**eTable 2.** Investigator's Global Assessment (IGA)

**eTable 3.** Summary of Serious Adverse Events

**eFigure 1. Average Daily Inhibiting Concentration for Specified Percentage Effect With Key Cytokines in Atopic Dermatitis**

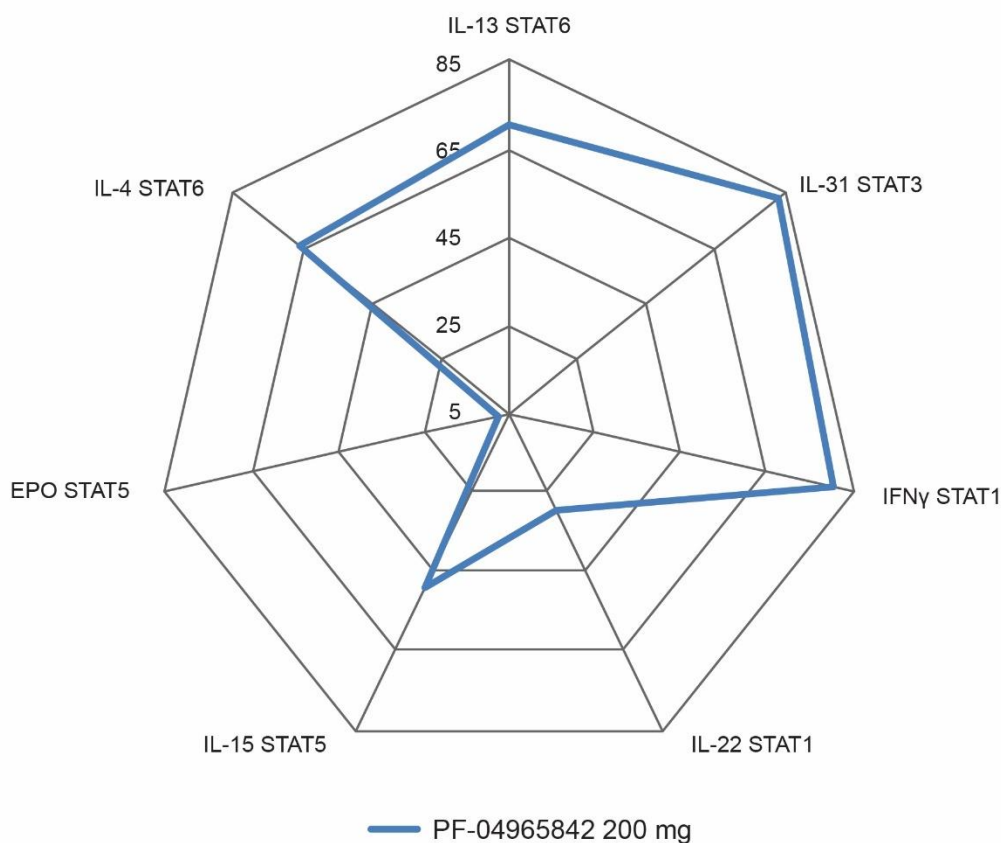

Numbers represent the specified percentage of effect (ie, IC<sub>85</sub>). Percentages of cytokine inhibition ( $IC_{xx} = 100 \cdot C_{av} / [IC_{50} + C_{av}]$ ) were determined at clinically meaningful doses, converting to free concentrations for both IC<sub>50</sub> and C<sub>av</sub>. As an example, for the concentrations achieved with a 200-mg dose in humans, and using concentration response data from in vitro assays, we would predict approximately 65% inhibition of IL-4, 70% inhibition of IL-13, and 1% inhibition of EPO. C<sub>av</sub>, average plasma concentration; EPO STAT5, erythropoietin; IC, inhibiting concentration; IFN, interferon; IL, interleukin; STAT, signal transducer and activator of transcription.

**eTable 1. Investigators**

| <b>Name</b>          | <b>Institute</b>                                                                                     | <b>City, Country</b>      |
|----------------------|------------------------------------------------------------------------------------------------------|---------------------------|
| Rodney Sinclair      | Sinclair Dermatology                                                                                 | East Melbourne, Australia |
| George Varigos       | Royal Melbourne Hospital                                                                             | Parkville, Australia      |
| Kurt Gebauer         | Fremantle Dermatology                                                                                | Fremantle, Australia      |
| Lynda Spelman        | Veracity Clinical Research                                                                           | Woolloongabba, Australia  |
| Michael Freeman      | The Skin Centre                                                                                      | Benowa, Australia         |
| Diana Rubel          | Woden Dermatology                                                                                    | Philip, Australia         |
| Ktut Arya            | Australian Clinical Research Network                                                                 | Sydney, Australia         |
| Shireen Sidhu        | North Eastern Health Specialists                                                                     | Hectorville, Australia    |
| Catherine Maari      | Innovaderm Research Inc.                                                                             | Montreal, Canada          |
| Melinda Gooderham    | SKiN Centre for Dermatology                                                                          | Peterborough, Canada      |
| Charles Lynde        | Lynderm Research Inc.                                                                                | Markham, Canada           |
| Yves Poulin          | Centre de Recherche Dermatologique du Quebec Metropolitain (CRDQ)                                    | Quebec, Canada            |
| Kim Papp             | K Papp Clinical Research                                                                             | Waterloo, Canada          |
| Mani Raman           | The Centre for Dermatology                                                                           | Richmond Hill, Canada     |
| Vincent Ho           | University of British Columbia                                                                       | Vancouver, Canada         |
| Jerry Tan            | Windsor Clinical Research Inc                                                                        | Windsor, Canada           |
| Sheetal Sapra        | Research by ICLS                                                                                     | Oakville, Canada          |
| Marni Wiseman        | Wiseman Dermatology Research Inc.                                                                    | Winnipeg, Canada          |
| Ginette Girard       | Diex Research Sherbrooke Inc.                                                                        | Sherbrooke, Canada        |
| Diamant Thaci        | Universitaetsklinikum Schleswig-Holstein                                                             | Luebeck, Germany          |
| Amir Yazdi           | Universitaetsklinikum Tuebingen <sup>a</sup>                                                         | Tuebingen, Germany        |
| Athanasios Tsianakas | Universitaetsklinikum Muenster Klinik fuer Hautkrankheiten                                           | Muenster, Germany         |
| Knut Schaekel        | Universitaetsklinikum Heidelberg <sup>a</sup>                                                        | Heidelberg, Germany       |
| Beatrice Gerlach     | Hautarztpraxis Dr. Beatrice Gerlach <sup>a</sup>                                                     | Dresden, Germany          |
| Margrit Simon        | ISA GmbH                                                                                             | Berlin, Germany           |
| Hans-Joachim Koenig  | emovis GmbH <sup>a</sup>                                                                             | Berlin, Germany           |
| Michael Sticherling  | Universitaetsklinikum Erlangen Hautklinik (Studienambulanz) <sup>a</sup>                             | Erlangen, Germany         |
| Lajos Kemeny         | Szegedi Tudományegyetem Szentgyörgyi Albert Klinikai Központ Borgyógyászati és Allergológiai Klinika | Szeged, Hungary           |
| Ivan Orojan          | Bacs Kiskun Megyei Korhaz, Bor es Nemibeteggondozo                                                   | Kecskemet, Hungary        |
| Noemi Bakos          | ALLERGO-DERM BAKOS Kft.                                                                              | Szolnok, Hungary          |
| Gabriella Nagy       | CRU Hungary Ltd.                                                                                     | Miskolc, Hungary          |
| Ellen Frankel        | Clinical Partners, LLC                                                                               | Rhode Island, USA         |
| James Solomon        | Leavitt Medical Associates of Florida d/b/a Ameriderm Research                                       | Florida, USA              |
| Joseph Fowler        | DS Research <sup>a</sup>                                                                             | Kentucky, USA             |
| Paul Yamauchi        | Clinical Science Institute                                                                           | California, USA           |
| George Schmieder     | Park Avenue Dermatology                                                                              | Florida, USA              |

| <b>Name</b>             | <b>Institute</b>                                       | <b>City, Country</b> |
|-------------------------|--------------------------------------------------------|----------------------|
| Matthew Zook            | Olympian Clinical Research                             | Florida, USA         |
| Peter Jenkin            | Dermatology Associates <sup>a</sup>                    | Washington, USA      |
| Jens Thiele             | Dermatology Specialists, Inc. <sup>a</sup>             | California, USA      |
| Richard Beasley         | Health Concepts                                        | South Dakota, USA    |
| Stacy Smith             | California Dermatology & Clinical Research Institute   | California, USA      |
| Shondra Smith           | Shondra L Smith, MD                                    | Louisiana, USA       |
| Emil Tanghetti          | Center for Dermatology and Laser Surgery               | California, USA      |
| Stephen Schleicher      | DermDox Centers for Dermatology                        | Pennsylvania, USA    |
| Lawrence Sher           | Peninsula Research Associates                          | California, USA      |
| Jeffrey Weinberg        | Forest Hills Dermatology Group                         | New York, USA        |
| Jerry Bagel             | Psoriasis Treatment Center of Central New Jersey       | New Jersey, USA      |
| Josep Genebriera-Delamo | North Florida Dermatology Associates, PA               | Florida, USA         |
| David Pariser           | Virginia Clinical Research, Inc                        | Virginia, USA        |
| Scott Fretzin           | Dawes Fretzin Clinical Research Group, LLC             | Indiana, USA         |
| Melody Stone            | MediSearch Clinical Trials                             | Missouri, USA        |
| Seth Forman             | Forward Clinical Trials                                | Florida, USA         |
| George Murakawa         | Somerset Skin Centre                                   | Michigan, USA        |
| Yvonne Knight           | West End Dermatology Associates <sup>a</sup>           | Virginia, USA        |
| Emily Becker            | Texas Dermatology and Laser Specialists                | Texas, USA           |
| Craig Teller            | Bellaire Dermatology Associates                        | Texas, USA           |
| Paul Getz               | Dundee Dermatology                                     | Illinois, USA        |
| Scott Guenther          | The Indiana Clinical Trials Center                     | Indiana, USA         |
| Iftikhar Hussain        | Vital Prospects Clinical Research Institute, PC        | Oklahoma, USA        |
| Mark Ling               | MedaPhase Inc.                                         | Georgia, USA         |
| Vincent Mirkil          | Clinical Research Consortium <sup>a</sup>              | Nevada, USA          |
| Weily Soong             | Clinical Research Center of Alabama                    | Alabama, USA         |
| Bruce Strober           | University of Connecticut Health Center (UConn Health) | Connecticut, USA     |
| Laura Ferris            | University of Pittsburgh Medical Center                | Pennsylvania, USA    |
| Brett King              | Yale School of Medicine <sup>a</sup>                   | Connecticut, USA     |
| Robert Nossa            | The Dermatology Group, P.C.                            | New Jersey, USA      |
| Chien Fang              | Huntington Medical Foundation                          | California, USA      |
| Neil Sadick             | Sadick Research Group                                  | New York, USA        |
| Neal Bhatia             | TCR Medical Corporation                                | California, USA      |

<sup>a</sup>Site received investigational products but did not randomize patients.

**eFigure 2. Study design**

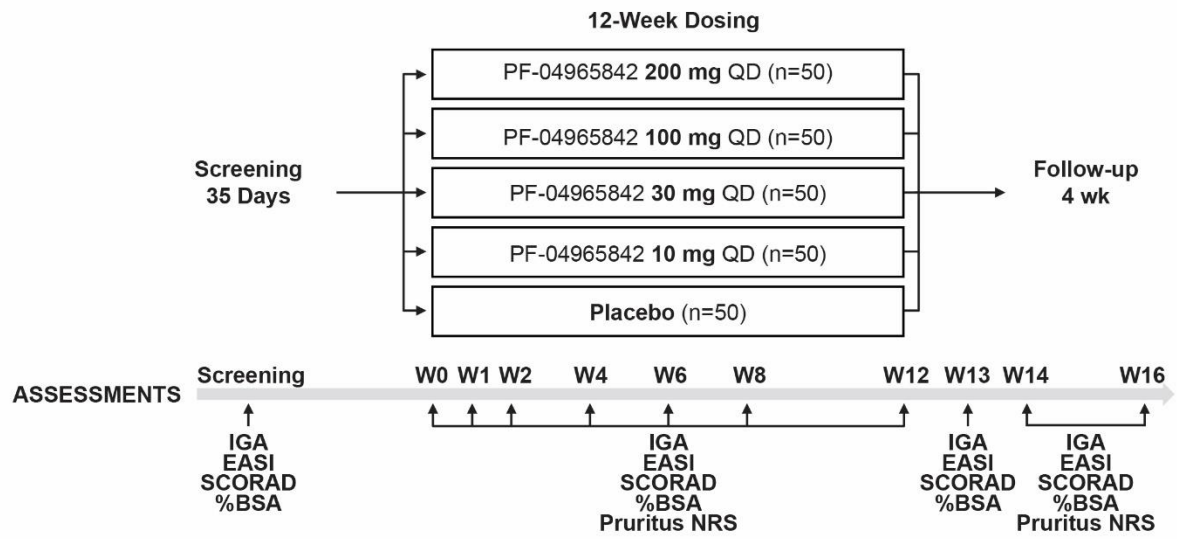

%BSA, percentage of body surface area; EASI, Eczema Area and Severity Index; IGA, Investigator's Global Assessment; NRS, numeric rating scale; QD, once-daily; SCORAD, Scoring Atopic Dermatitis; W, week.

## eAppendix. Inclusion and Exclusion Criteria

### Key Inclusion Criteria

1. Men or women between 18 and 75 years of age, inclusive, at time of informed consent
2. Patients willing and able to comply with scheduled visits, treatment plan, laboratory testing, and other study procedures
3. Men able to father children and women of childbearing potential and at risk for pregnancy had to agree to use a highly effective method of contraception throughout the study and for  $\geq 28$  days after the last dose of study treatment
4. Met the following atopic dermatitis criteria:
  - a. Clinical diagnosis of chronic atopic dermatitis for  $\geq 1$  year before day 1 and confirmed atopic dermatitis (Hanifin and Rajka criteria<sup>1</sup> of atopic dermatitis) at the screening visit
  - b. Inadequate response to treatment with topical medications (topical corticosteroids or topical calcineurin inhibitors) given for  $\geq 4$  weeks or unable to receive topical treatment within 12 months before the first dose of study drug because it was otherwise medically inadvisable (eg, application to a large %BSA which is associated with increased risk for systemic absorption and hypothalamic-pituitary-adrenal axis suppression, cutaneous side effects such as burning or stinging sensations with topical calcineurin inhibitors or skin atrophy, purpura, telangiectasia, and striae with chronic use of topical corticosteroids)
  - c. Moderate-to-severe atopic dermatitis (percentage of affected body surface area  $\geq 10$ , investigator's global assessment score  $\geq 3$ , and Eczema Area and Severity Index score  $\geq 12$  at the screening and baseline visits)
5. Had to agree to avoid prolonged exposure to the sun and not to use tanning booths, sun lamps, or other ultraviolet light sources during the study
6. If receiving concomitant medications for any reason other than atopic dermatitis, had to be on a stable regimen, defined as not starting a new drug or changing dosage within 7 days or 5 half-lives (whichever was longer) before day 1. Patient had to be willing to stay on a stable regimen during the duration of the study

### Exclusion Criteria

1. Severe acute or chronic medical or psychiatric condition or laboratory abnormality with the potential to interfere with the study
2. Active forms of other inflammatory skin diseases
3. Evidence of skin conditions (eg, psoriasis, seborrheic dermatitis, lupus) on day 1 that would interfere with evaluation of atopic dermatitis or response to treatment
4. Received any of the following treatments specified in the timeframes outlined as follows:
  - a. Within 6 months before the first dose of study drug
    - i. Any cell-depleting agents, including but not limited to rituximab: within 6 months before the first dose of study drug or 5 half-lives (if known), whichever was longer, or until lymphocyte count returned to normal, whichever was longer
  - b. Within 12 weeks before the first dose of study drug
    - i. Any studies with Janus kinase (JAK) inhibitors
    - ii. Other biologics within 12 weeks before the first dose of study drug or 5 half-lives (if known), whichever was longer
  - c. Within 8 weeks before the first dose of study drug
    - i. Participation in other studies involving investigational drugs within 8 weeks before the first dose of study drug or within 5 half-lives (if known), whichever was longer
  - d. Within 6 weeks before the first dose of study drug
    - i. Had been vaccinated with live or attenuated live vaccine
  - e. Within 4 weeks before the first dose of study drug
    - i. Use of oral immune suppressants (eg, cyclosporine A, azathioprine, methotrexate, mycophenolate mofetil, systemic corticosteroids, interferon- $\gamma$ ) within 4 weeks before the first dose of study drug or within 5 half-lives (if known), whichever was longer
    - ii. Phototherapy (narrow-band ultraviolet B) or broadband phototherapy
    - iii. Regular use (more than 2 visits per week) of a tanning booth/parlor
  - f. Within 1 week before the first dose of study drug

- i. Topical treatments that could have affected atopic dermatitis (eg, corticosteroids, calcineurin inhibitors, tars, antibiotic creams, topical antihistamines)  
Note: Corticosteroid inhalers and intranasal sprays were allowed for patients with stable asthma
- g. Herbal medications with unknown properties or known beneficial effects for atopic dermatitis

**eTable 2. Investigator’s Global Assessment (IGA)**

| <b>Score</b> | <b>Category</b> | <b>Description<sup>a</sup></b>                                                                                                                                                                                                                                                                                                     |
|--------------|-----------------|------------------------------------------------------------------------------------------------------------------------------------------------------------------------------------------------------------------------------------------------------------------------------------------------------------------------------------|
| 0            | Clear           | Atopic dermatitis is cleared, except for any residual discoloration (postinflammatory hyperpigmentation and/or hypopigmentation)                                                                                                                                                                                                   |
| 1            | Almost clear    | Overall, atopic dermatitis is not entirely cleared, and remaining lesions are light pink (not including postinflammatory hyperpigmentation), and/or have barely palpable hard thickened skin and/or papules, and/or have barely perceptible lichenification; excoriation and oozing/crusting are absent                            |
| 2            | Mild            | Overall, atopic dermatitis consists of lesions that are light red, with slight but definite hard thickened skin and/or papules; with slight but definite linear or picked scratch marks or penetrating surface injury; with slight but definite thickened skin, fine skin markings, and lichenoid scale; oozing/crusting is absent |
| 3            | Moderate        | Overall, atopic dermatitis consists of lesions that are red, with easily palpable moderate hard thickened skin and/or papules; with moderate linear or picked scratch marks or penetrating surface injury; with moderate thickened skin, coarse skin markings, and coarse lichenoid scale; with slight oozing/crusting             |
| 4            | Severe          | Overall, atopic dermatitis consists of lesions that are deep, dark red, with severe hard thickened skin and/or papules; with severe linear or picked scratch marks or penetrating surface injury; with severe thickened skin with very coarse skin markings and lichenoid scale; with moderate to severe oozing/crusting           |

<sup>a</sup>The IGA will exclude scalp, palms, and soles from the assessment/scoring.



**eFigure 3. Proportion of Patients Achieving Investigator’s Global Assessment Clear or Almost Clear With  $\geq 2$ -Grade Improvement from Baseline at Week 12 (E<sub>max</sub> fitted curve with standard error)**

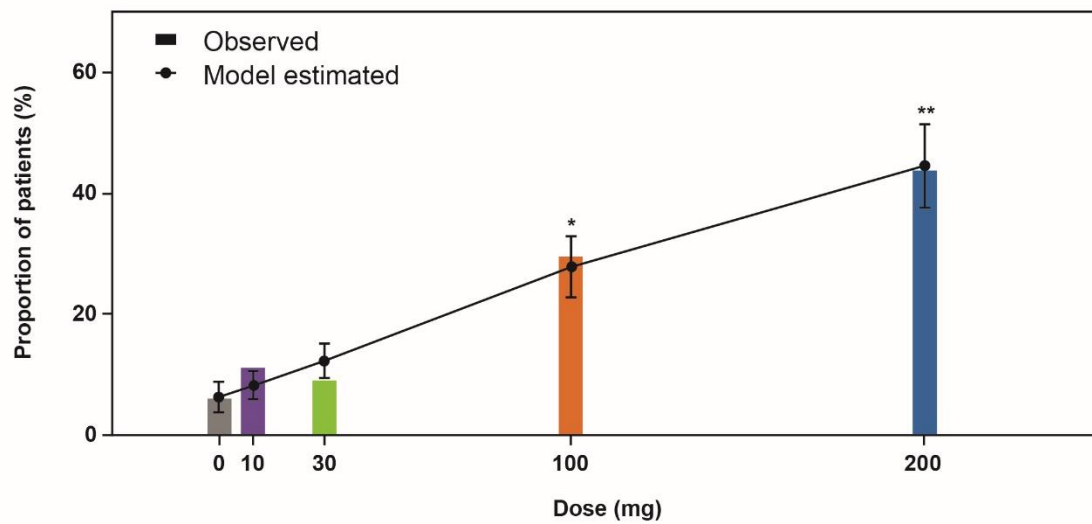

For discontinued patients, any missing value for all subsequent visits until week 12 was imputed using the nonresponder imputation approach. Baseline was defined as the last measurement before first dosing. E<sub>max</sub> denotes the difference between maximum achievable response (at infinite dose) and baseline.

**eFigure 4. Proportion of Patients With Baseline Pruritus NRS Score of  $\geq 4$  Achieving  $\geq 4$ -Point Improvement From Baseline Over the First 2 Weeks**

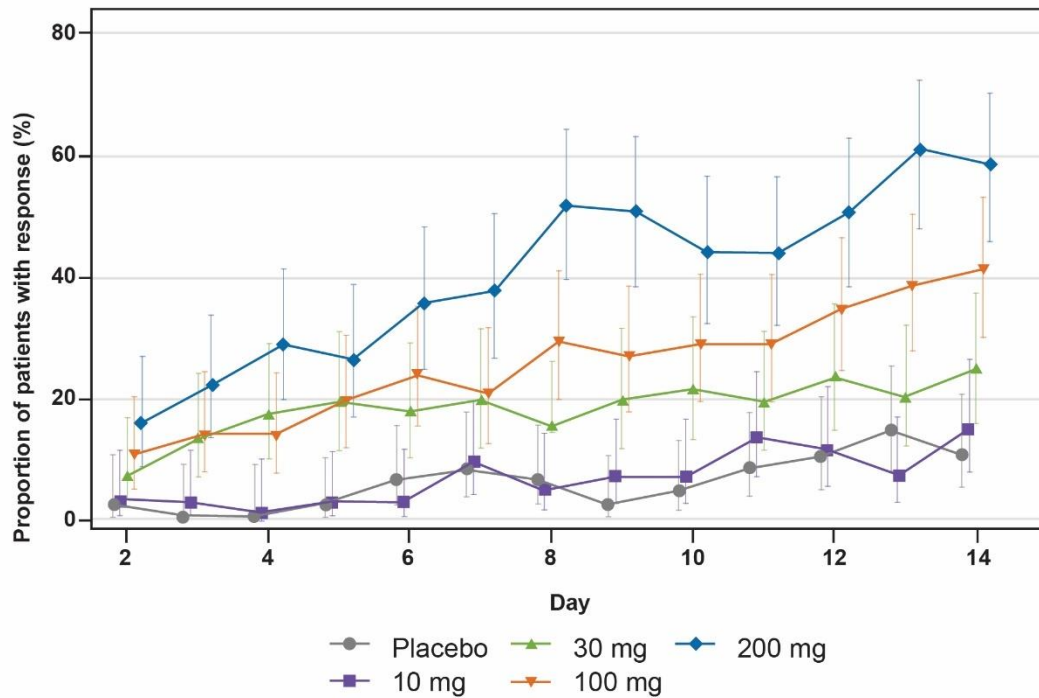

A logistic regression model was used including treatment as a main effect and baseline score as a covariate. Bars denote 90% CIs. For discontinued patients, any missing value for all subsequent visits until week 12 was imputed using the nonresponder imputation approach. Baseline was defined as the last measurement before first dosing. NRS, numeric rating scale.

## eFigure 5. Photographic Evidence

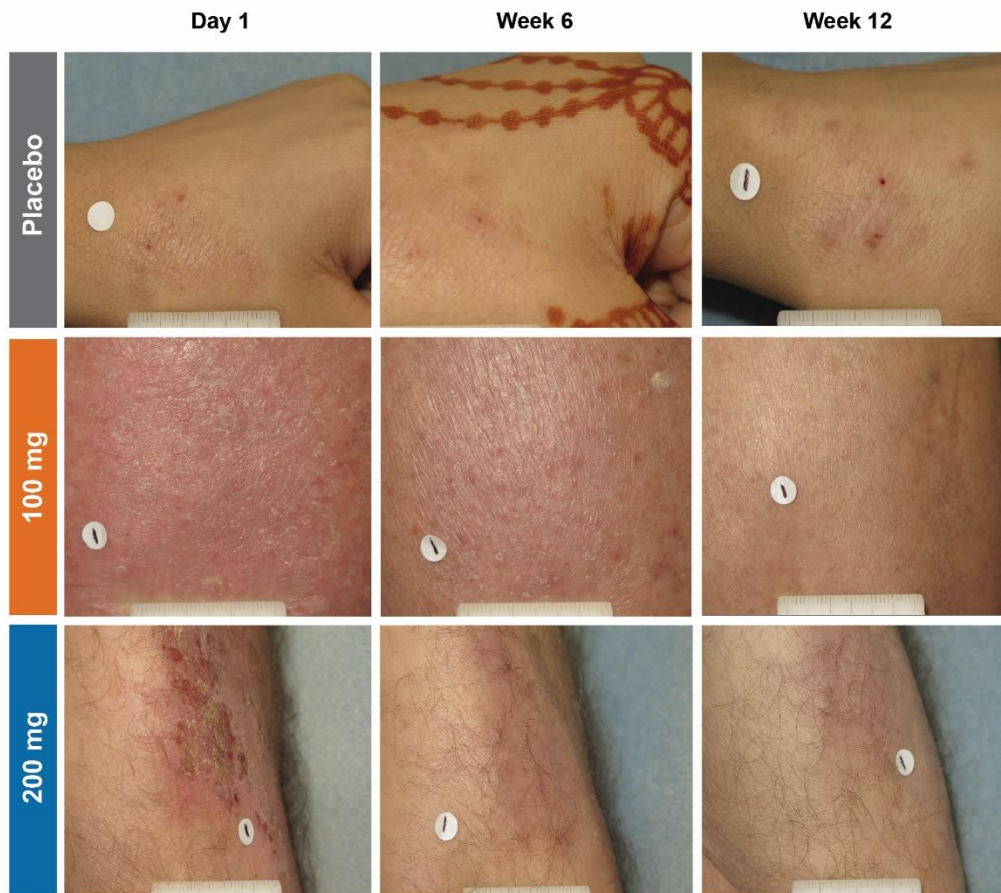

Representative photographs at day 1, week 4, and week 12 are presented for patients treated with placebo, 100 mg abrocitinib, and 200 mg abrocitinib.

eFigure 6. Mean Absolute Value Versus Time for Platelets

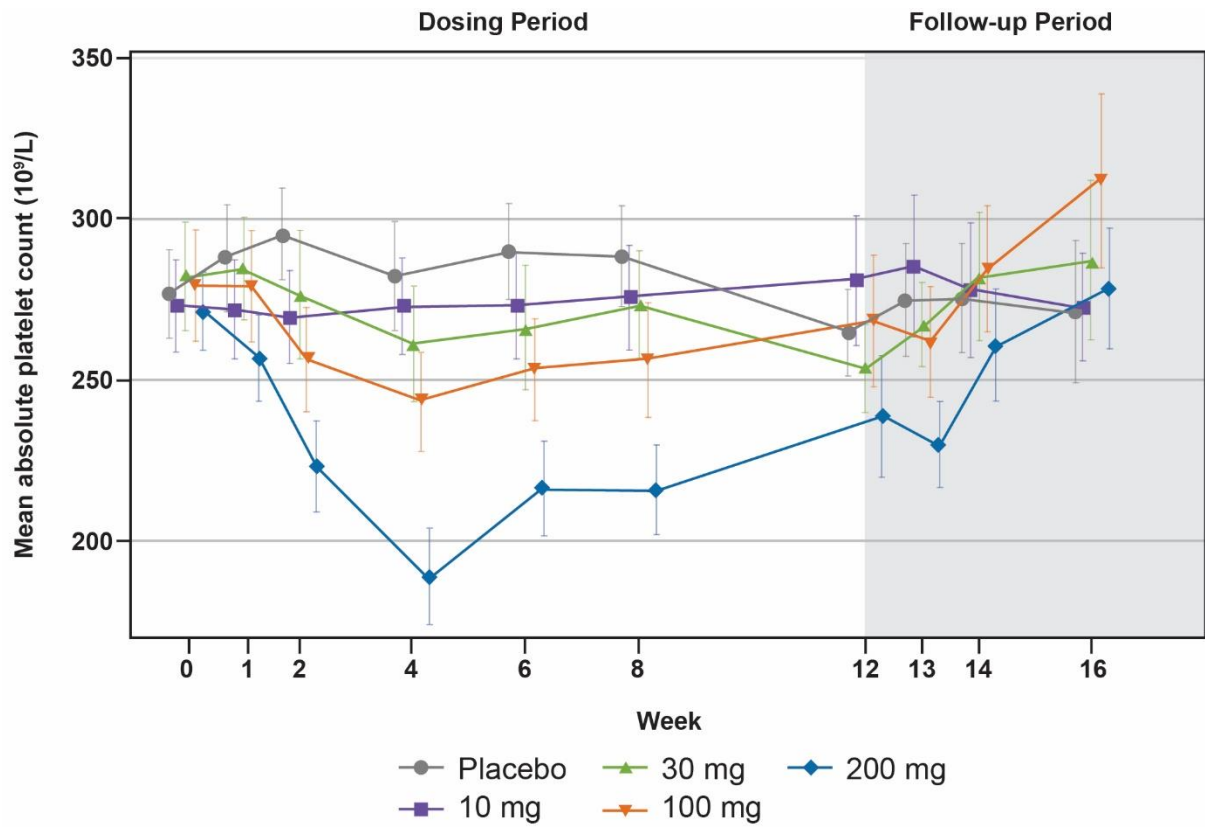

Bars denote 90% CIs.

**eTable 3. Summary of Serious Adverse Events**

| Preferred Term                         | Event Start/Stop, day | Causality |
|----------------------------------------|-----------------------|-----------|
| Placebo                                |                       |           |
| Dermatitis/condition aggravated        | 113/118               | Unrelated |
| Dermatitis atopic                      | 17/49                 | Unrelated |
| 10 mg                                  |                       |           |
| Malignant melanoma                     | 135/205               | Unrelated |
| Asthma/condition aggravated            | 20/23                 | Unrelated |
| 100 mg                                 |                       |           |
| Dermatitis atopic/condition aggravated | 89/100                | Unrelated |
| Eczema herpeticum <sup>a</sup>         | 21/30                 | Related   |
| Asthma <sup>a</sup>                    | 75/85                 | Unrelated |
| 200 mg                                 |                       |           |
| Pneumonia                              | 102/110               | Related   |
| Pulmonary embolism <sup>a</sup>        | 80/155                | Unrelated |

<sup>a</sup>Treatment permanently discontinued because of a serious adverse event.

## eReferences

1. Hanifin JM, Rajka G. Diagnostic features of atopic dermatitis. *Acta Derm Venereol.* 1980;60:44-47.
