# Supplementary material for: Efficacy and Safety of Oral Janus Kinase 1 Inhibitor Abrocitinib for Patients With Atopic Dermatitis: A Phase 2 Randomized Clinical Trial
Source: PubMed Central journal article supplement — JAMA Dermatol. 2019 Oct 2;155(12):1371–9. doi: 10.1001/jamadermatol.2019.2855 (PMC6777226; doi:10.1001/jamadermatol.2019.2855), 2019-10-02
Supplement: jamadermatol-155-1371-s003.pdf [file jamadermatol-155-1371-s003.pdf]

## Data Sharing Statement

Gooderham. Efficacy and Safety of Oral Janus Kinase 1 Inhibitor Abrocitinib for Patients With Atopic Dermatitis. *JAMA Dermatol*. Published October 02, 2019. 10.1001/jamadermatol.2019.2855

### Data

**Data available:** Yes

**Data types:** Other (please specify)

**Additional Information:** <https://www.pfizer.com/science/clinical-trials/trial-data-and-results>

**How to access data:** <https://www.pfizer.com/science/clinical-trials/trial-data-and-results>

**When available:** With publication

### Supporting Documents

**Document types:** None

### Additional Information

**Who can access the data:** <https://www.pfizer.com/science/clinical-trials/trial-data-and-results>

**Types of analyses:** <https://www.pfizer.com/science/clinical-trials/trial-data-and-results>

**Mechanisms of data**

**availability:** <https://www.pfizer.com/science/clinical-trials/trial-data-and-results>
